# Supplementary material for: Over-Expression of Inhibitor of Differentiation 2 Attenuates Post-Infarct Cardiac Fibrosis Through Inhibition of TGF-β1/Smad3/HIF-1α/IL-11 Signaling Pathway
Source: PubMed Central journal article supplement (PMC6876274; doi:10.3389/fphar.2019.01349), 2019-11-13

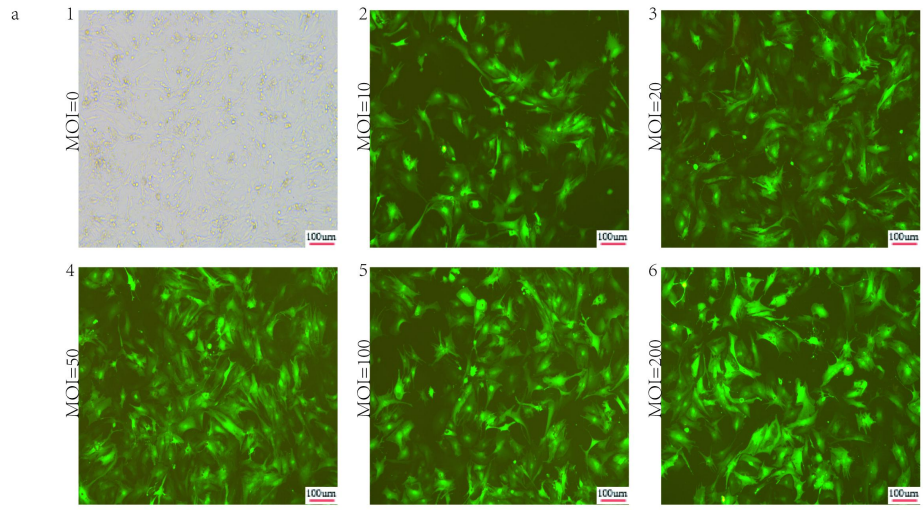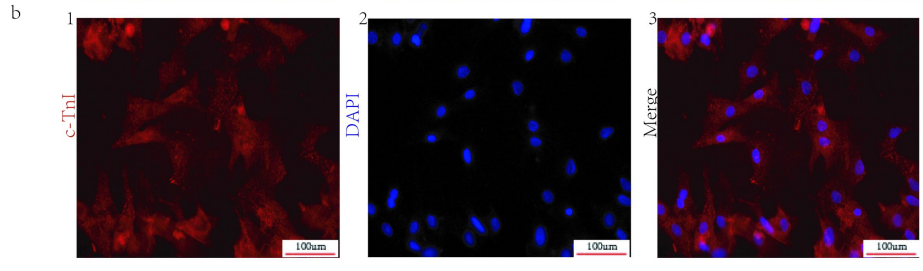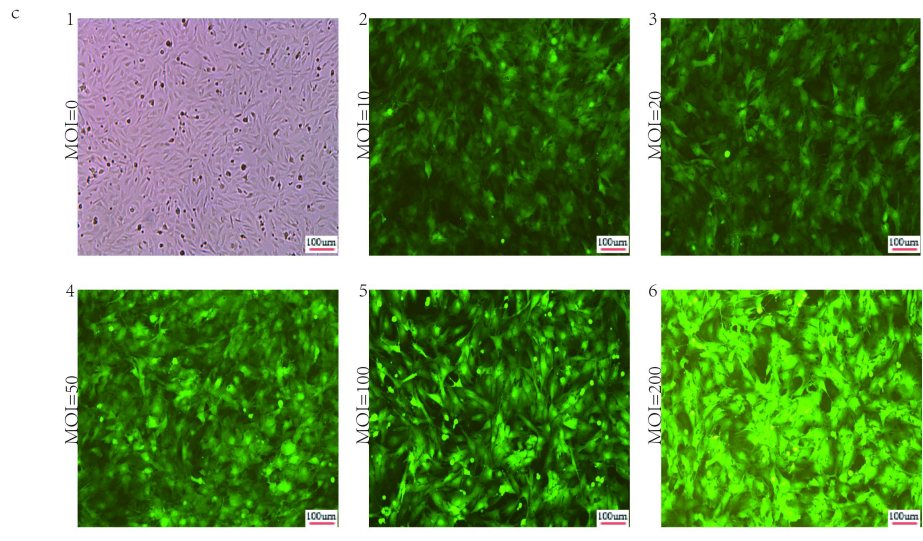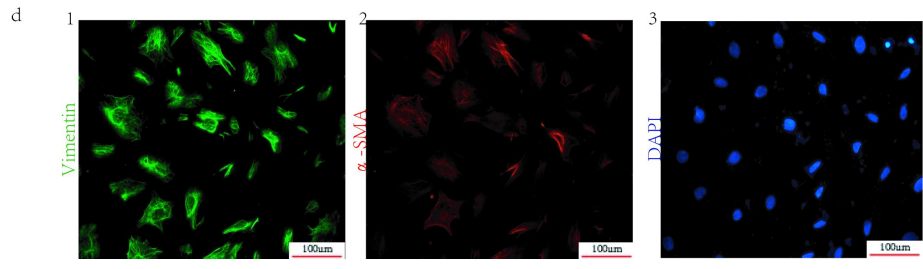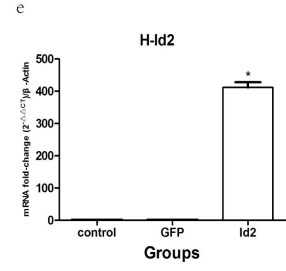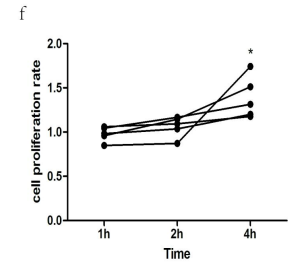

Fig.S1 Fluorescence image of NRVMs and CFs. (A) NRVMs transfected Ad-GFP-Id2 with different MOI value(n=3). 1,MOI=0;2,MOI=10;3,MOI=20;4,MOI=50;5,MOI=100;6,MOI=200. (B) immunofluorescence images of NRVMs(n=3). Red,  $\alpha$ -SMA; blue, nuclei. (C) CFs transfected Ad-GFP-Id2 with different MOI value(n=3). 1,MOI=0;2,MOI=10;3,MOI=20;4,MOI=50;5,MOI=100;6,MOI=200. (D) Immunofluorescence images of CFs(n=3). Red,  $\alpha$ -SMA; green, vimentin;blue, nuclei. (E) Human-Id2 mRNA levels in CFs after transfected with Ad-GFP-Id2 and Ad-GFP for 48 hours(n=3). (F) The proliferation rate of Cfs in incubation with CCK-8 in different time(n=5).  $\beta$ -actin was used as the loading control. Data represent means  $\pm$  SEM. \*,  $P < 0.05$  VS control group and GFP group or 1h.

Fig.S2 The original picture of West Blotting for the relative proteins in the article.

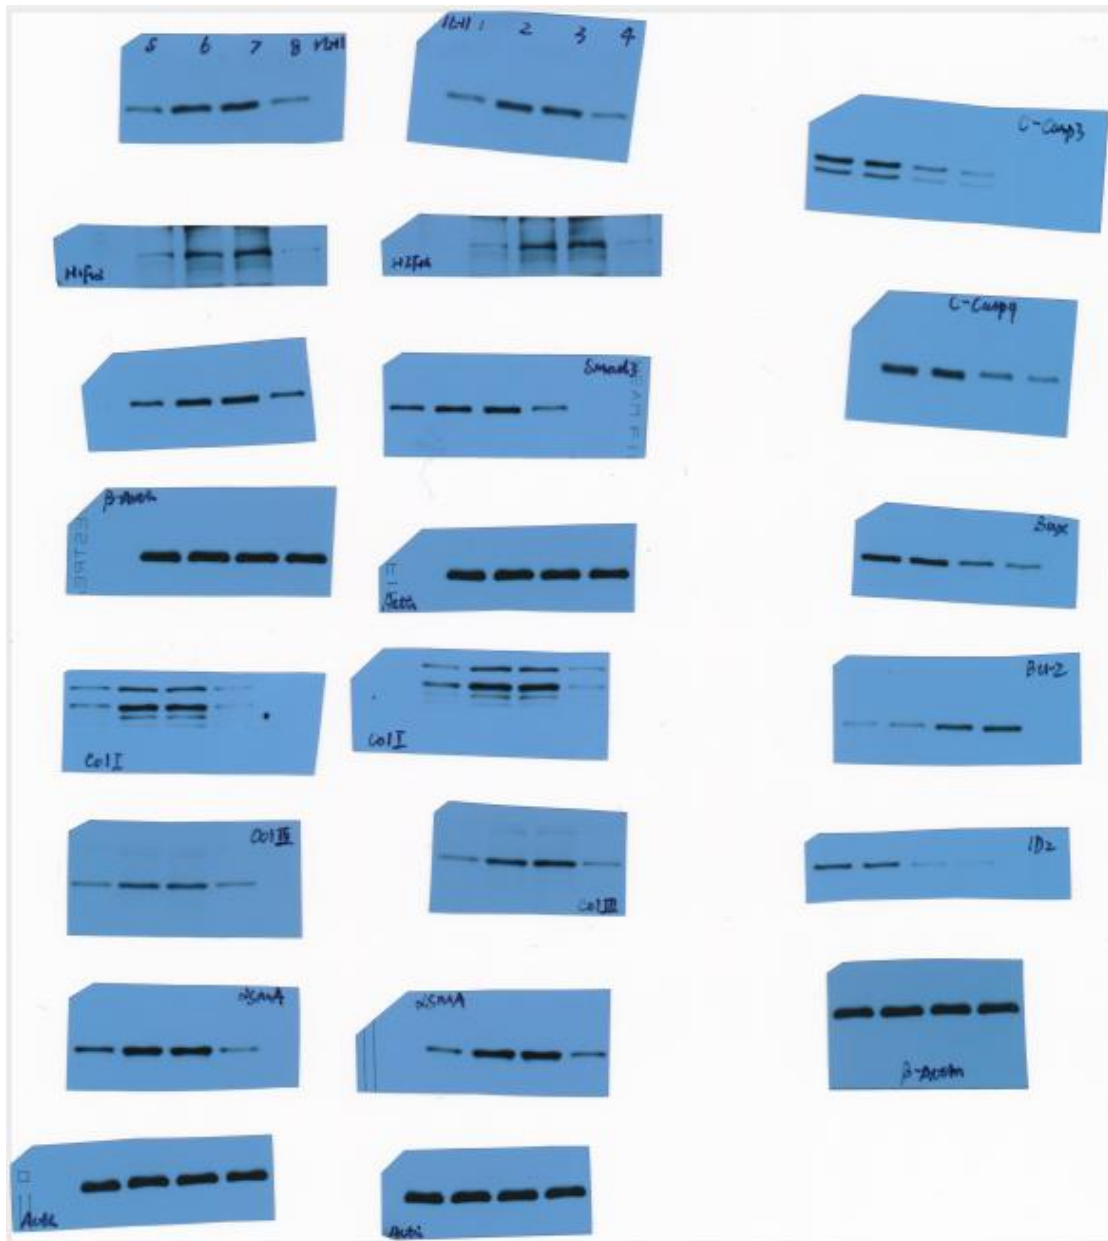

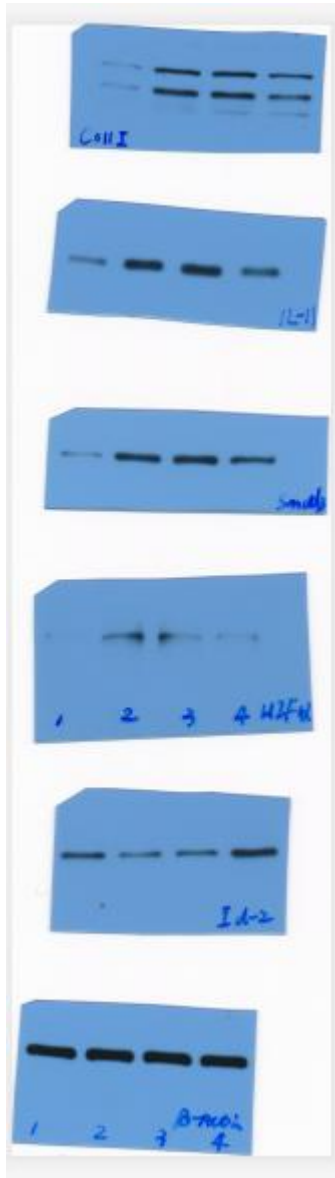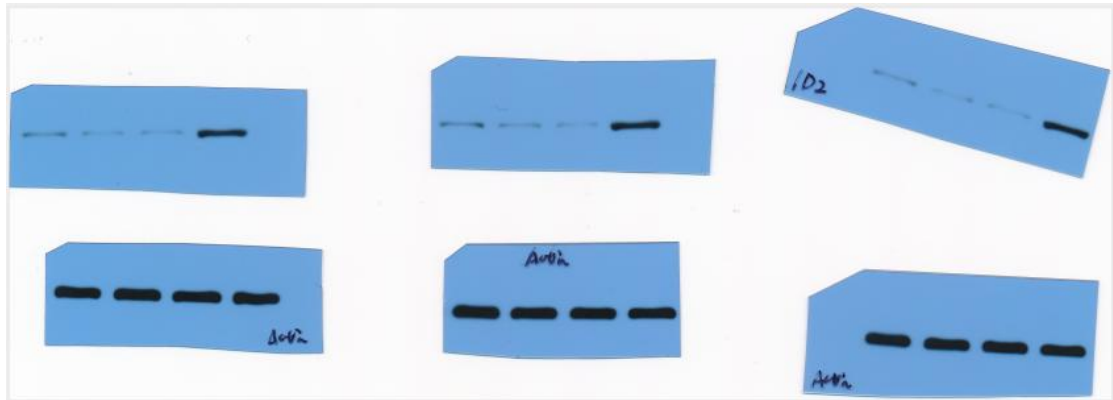

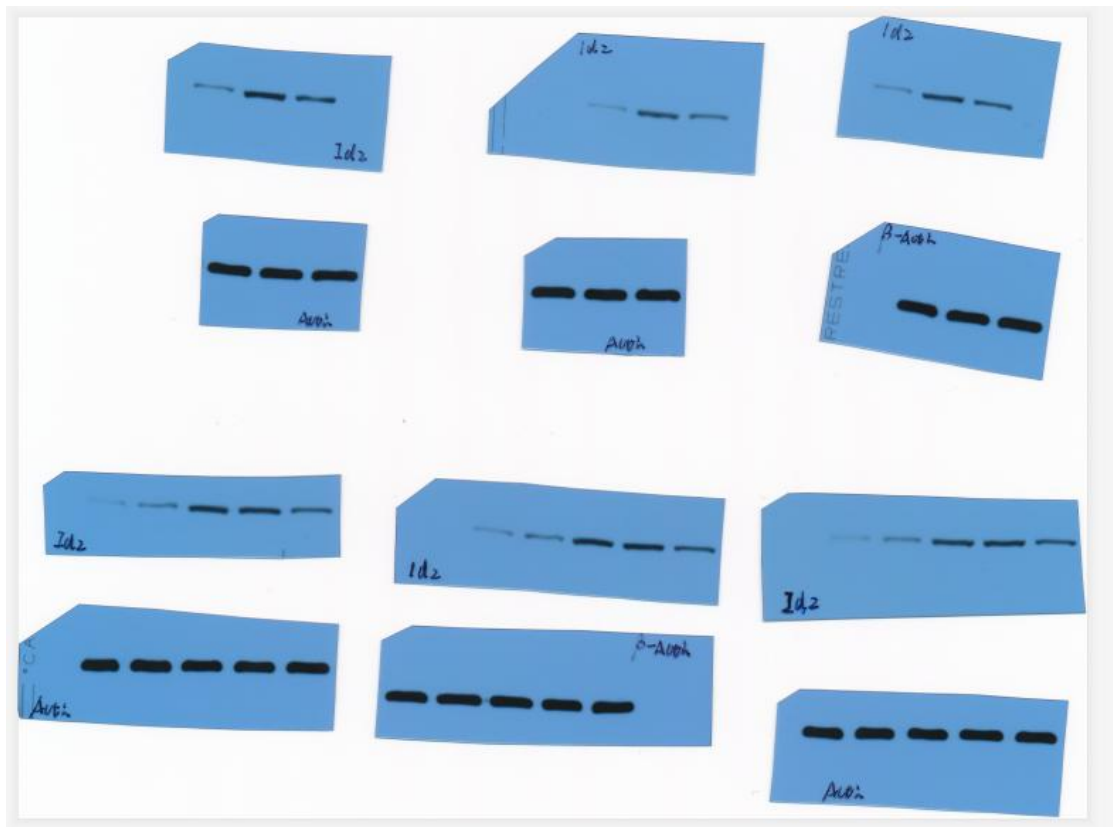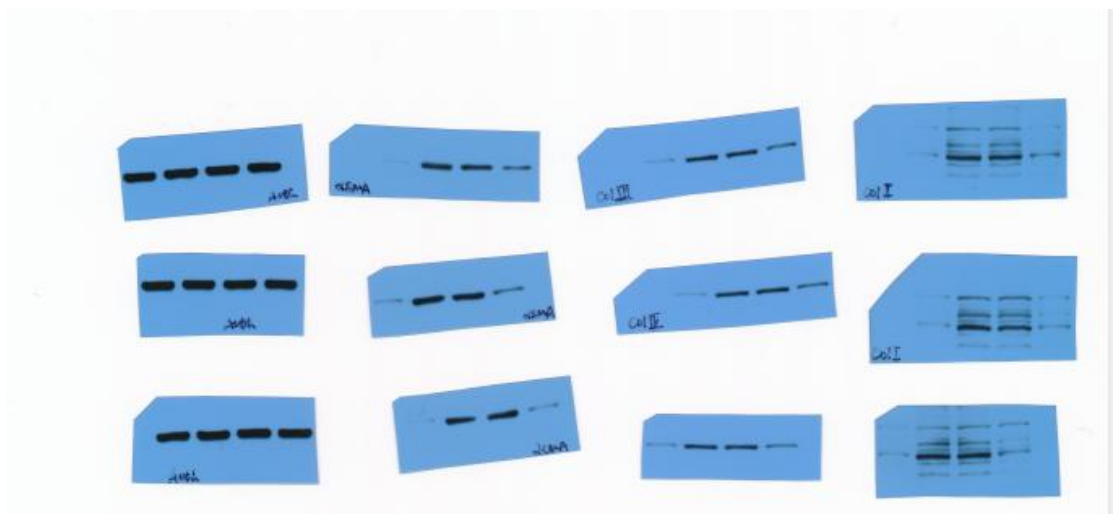

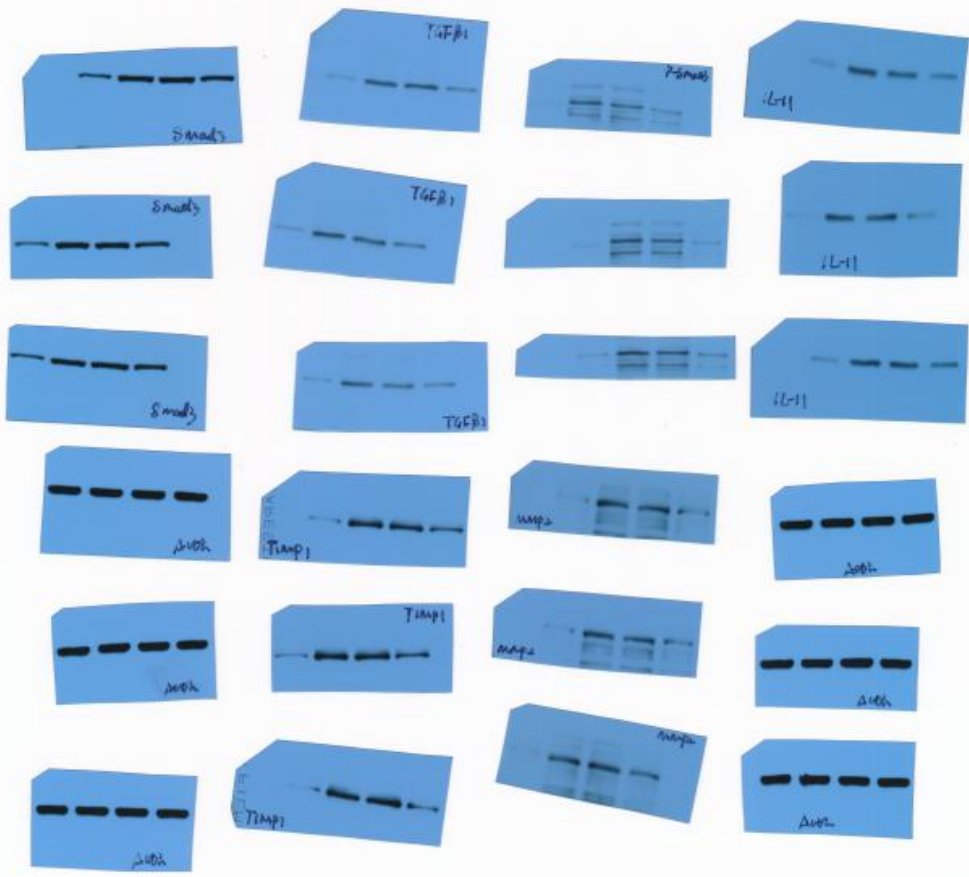



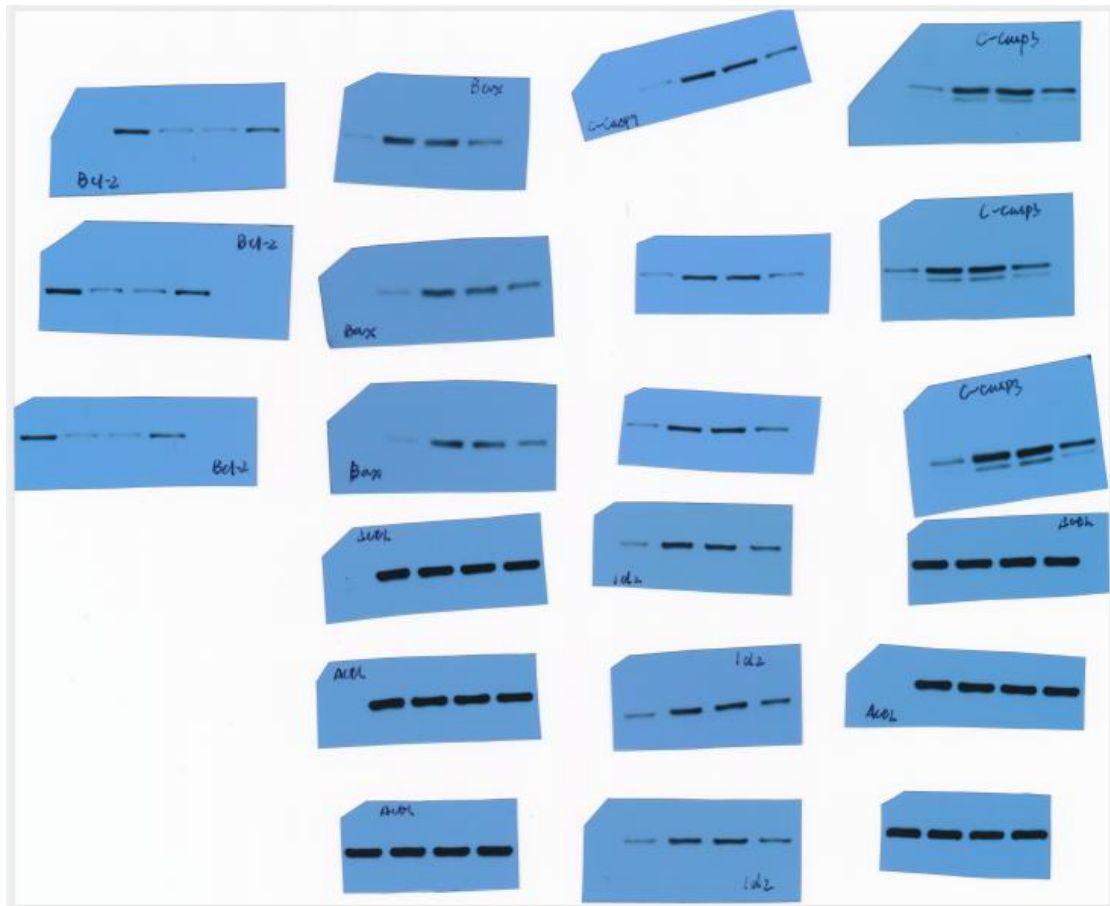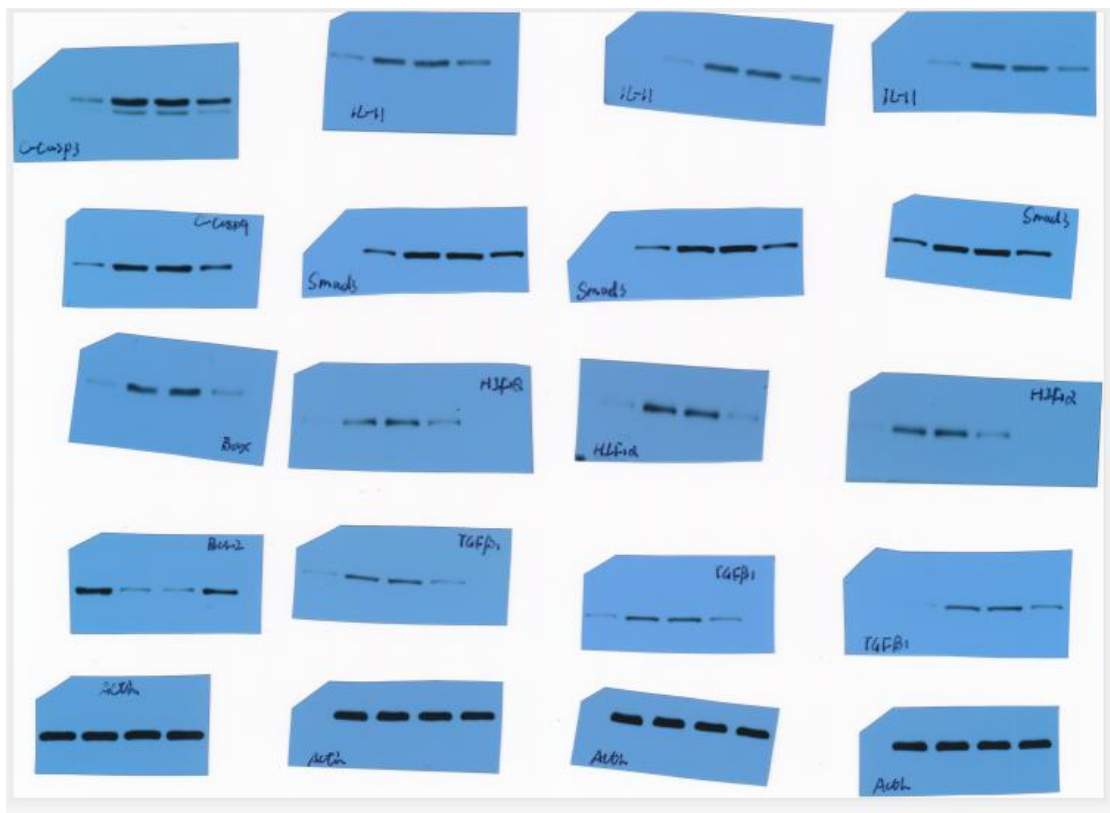

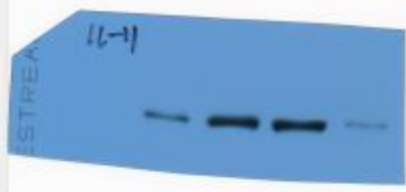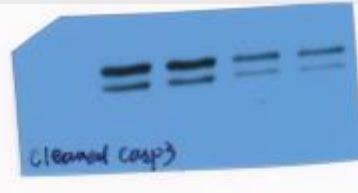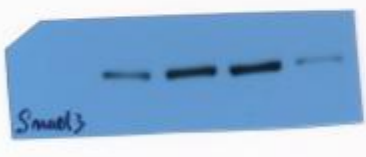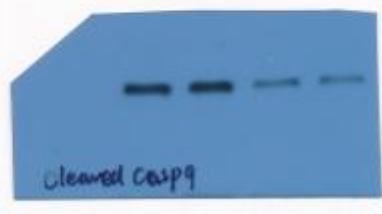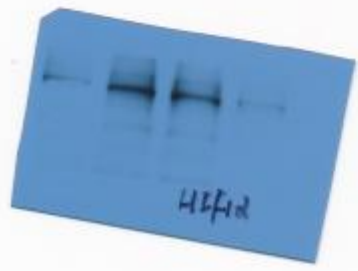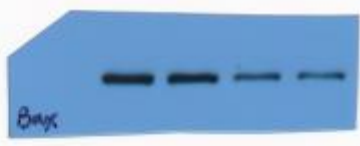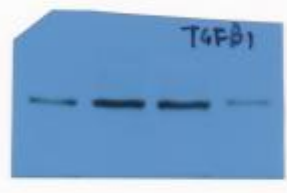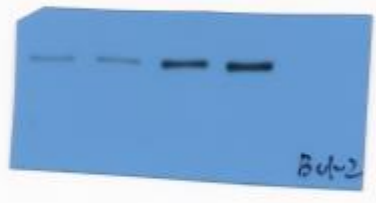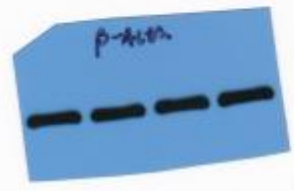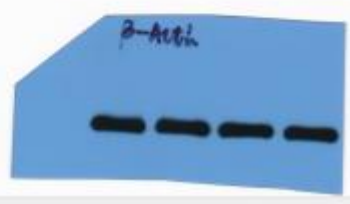

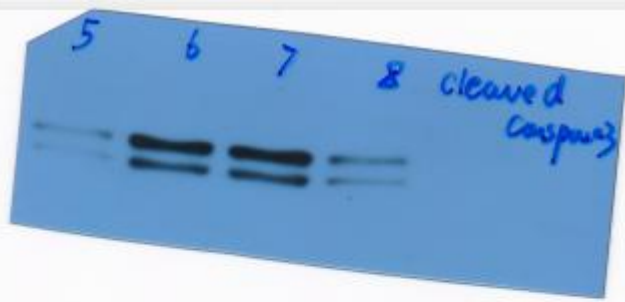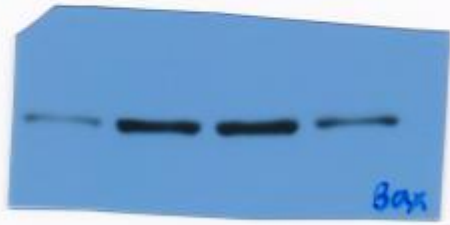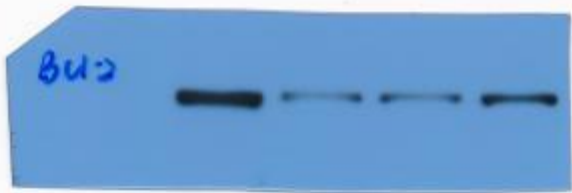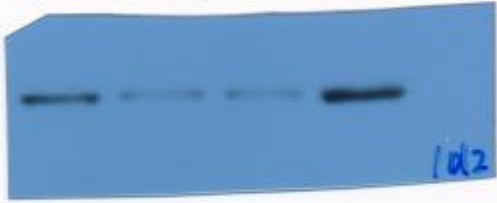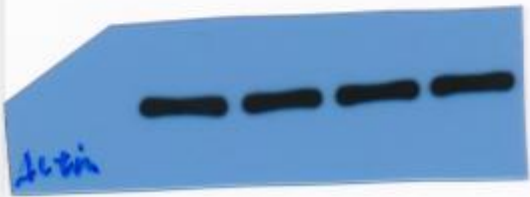

Supplement: DataSheet_1.pdf [file DataSheet_1.pdf]
